# Supplementary material
Source: MDPI journal article supplement (https://www.mdpi.com/2079-3197/9/10/109)
Supplement: s1 [file s1]

| Day N<br>counted<br>from the<br>24/1/20 | Confirmed<br>world daily<br>new cases<br>at day N<br>from the<br>24/01/2020 | Pearson<br>correlation<br>coefficient<br>of the 140<br>mobile<br>windows<br>starting<br>at day N | D | Pearson<br>correlation<br>coefficient<br>of the 20<br>mobile<br>windows<br>starting at<br>week day D | E | W  | Pearson<br>correlation<br>coefficient<br>of the 140 mobile<br>windows starting<br>at week day E of<br>the week W | Mean of the<br>correlation<br>coefficients<br>between the first<br>window and the 20<br>mobile windows<br>starting at week day<br>E and number of<br>such correlation<br>coefficients<br>significantly > 0 |       |
|-----------------------------------------|-----------------------------------------------------------------------------|--------------------------------------------------------------------------------------------------|---|------------------------------------------------------------------------------------------------------|---|----|------------------------------------------------------------------------------------------------------------------|------------------------------------------------------------------------------------------------------------------------------------------------------------------------------------------------------------|-------|
| 34, Wed                                 | 1155                                                                        |                                                                                                  |   |                                                                                                      |   |    |                                                                                                                  |                                                                                                                                                                                                            |       |
| 35, Thu                                 | 1472                                                                        |                                                                                                  |   |                                                                                                      |   |    |                                                                                                                  |                                                                                                                                                                                                            |       |
| 36, Fri                                 | 1835                                                                        |                                                                                                  |   |                                                                                                      |   |    |                                                                                                                  |                                                                                                                                                                                                            |       |
| 37, Sat                                 | 2218                                                                        |                                                                                                  |   |                                                                                                      |   |    |                                                                                                                  |                                                                                                                                                                                                            |       |
| 38, Sun                                 | 2662                                                                        |                                                                                                  |   |                                                                                                      |   |    |                                                                                                                  |                                                                                                                                                                                                            |       |
| 39, Mon                                 | 2644                                                                        |                                                                                                  |   |                                                                                                      |   |    |                                                                                                                  |                                                                                                                                                                                                            |       |
| 40, Tue                                 | 3331                                                                        |                                                                                                  |   |                                                                                                      |   |    |                                                                                                                  |                                                                                                                                                                                                            |       |
| 41                                      | 3206                                                                        |                                                                                                  |   |                                                                                                      |   |    |                                                                                                                  |                                                                                                                                                                                                            |       |
| 42                                      | 4327                                                                        |                                                                                                  |   |                                                                                                      |   |    |                                                                                                                  |                                                                                                                                                                                                            |       |
| 43                                      | 5174                                                                        |                                                                                                  |   |                                                                                                      |   |    |                                                                                                                  |                                                                                                                                                                                                            |       |
| 44                                      | 5771                                                                        |                                                                                                  |   |                                                                                                      |   |    |                                                                                                                  |                                                                                                                                                                                                            |       |
| 45                                      | 5963                                                                        |                                                                                                  |   |                                                                                                      |   |    |                                                                                                                  |                                                                                                                                                                                                            |       |
| 46, Mon                                 | 7294                                                                        |                                                                                                  |   |                                                                                                      |   |    |                                                                                                                  |                                                                                                                                                                                                            |       |
| 47                                      | 8858                                                                        |                                                                                                  |   |                                                                                                      |   |    |                                                                                                                  |                                                                                                                                                                                                            |       |
| 48                                      | 11465                                                                       |                                                                                                  |   |                                                                                                      |   |    |                                                                                                                  |                                                                                                                                                                                                            |       |
| 49                                      | 13420                                                                       |                                                                                                  |   |                                                                                                      |   |    |                                                                                                                  |                                                                                                                                                                                                            |       |
| 50                                      | 16767                                                                       |                                                                                                  |   |                                                                                                      |   |    |                                                                                                                  |                                                                                                                                                                                                            |       |
| 51                                      | 17329                                                                       |                                                                                                  |   |                                                                                                      |   |    |                                                                                                                  |                                                                                                                                                                                                            |       |
| 52                                      | 19500                                                                       |                                                                                                  |   |                                                                                                      |   |    |                                                                                                                  |                                                                                                                                                                                                            |       |
| 53, Mon                                 | 20715                                                                       |                                                                                                  |   |                                                                                                      |   |    |                                                                                                                  |                                                                                                                                                                                                            |       |
| 54, Tue                                 | 22788                                                                       | 0,871903                                                                                         | 1 | 0,871903                                                                                             | 1 | 1  | 0,871903                                                                                                         | 0,513784                                                                                                                                                                                                   | 14/20 |
| 55, Wed                                 | 26840                                                                       | 0,833092                                                                                         | 2 | 0,833092                                                                                             | 1 | 2  | 0,665054                                                                                                         |                                                                                                                                                                                                            |       |
| 56, Thu                                 | 31636                                                                       | 0,798643                                                                                         | 3 | 0,798643                                                                                             | 1 | 3  | 0,052967                                                                                                         |                                                                                                                                                                                                            |       |
| 57, Fri                                 | 38016                                                                       | 0,774313                                                                                         | 4 | 0,774313                                                                                             | 1 | 4  | 0,215606                                                                                                         |                                                                                                                                                                                                            |       |
| 58, Sat                                 | 33019                                                                       | 0,763159                                                                                         | 5 | 0,763159                                                                                             | 1 | 5  | 0,296313                                                                                                         |                                                                                                                                                                                                            |       |
| 59, Sun                                 | 36073                                                                       | 0,789508                                                                                         | 6 | 0,789508                                                                                             | 1 | 6  | 0,395235                                                                                                         |                                                                                                                                                                                                            |       |
| 60, Mon                                 | 43671                                                                       | 0,767306                                                                                         | 7 | 0,767306                                                                                             | 1 | 7  | 0,428514                                                                                                         |                                                                                                                                                                                                            |       |
| 61                                      | 44250                                                                       | 0,665054                                                                                         | 1 | 0,665054                                                                                             | 1 | 8  | 0,669878                                                                                                         |                                                                                                                                                                                                            |       |
| 62                                      | 48363                                                                       | 0,540774                                                                                         | 2 | 0,540774                                                                                             | 1 | 9  | 0,778017                                                                                                         |                                                                                                                                                                                                            |       |
| 63                                      | 59111                                                                       | 0,383754                                                                                         | 3 | 0,383754                                                                                             | 1 | 10 | 0,719714                                                                                                         |                                                                                                                                                                                                            |       |
| 64                                      | 62936                                                                       | 0,311278                                                                                         | 4 | 0,311278                                                                                             | 1 | 11 | 0,625795                                                                                                         |                                                                                                                                                                                                            |       |
| 65                                      | 64624                                                                       | 0,266571                                                                                         | 5 | 0,266571                                                                                             | 1 | 12 | 0,66546                                                                                                          |                                                                                                                                                                                                            |       |
| 66                                      | 57929                                                                       | 0,276242                                                                                         | 6 | 0,276242                                                                                             | 1 | 13 | 0,780229                                                                                                         |                                                                                                                                                                                                            |       |
| 67                                      | 61794                                                                       | 0,230716                                                                                         | 7 | 0,230716                                                                                             | 1 | 14 | 0,72027                                                                                                          |                                                                                                                                                                                                            |       |
| 68                                      | 70581                                                                       | 0,052967                                                                                         | 1 | 0,052967                                                                                             | 1 | 15 | 0,707716                                                                                                         |                                                                                                                                                                                                            |       |

|     |       |          |   |          |   |    |          |          |       |
|-----|-------|----------|---|----------|---|----|----------|----------|-------|
| 69  | 74667 | -0,06834 | 2 | -0,06834 | 1 | 16 | 0,653118 |          |       |
| 70  | 76882 | -0,17189 | 3 | -0,17189 | 1 | 17 | 0,656816 |          |       |
| 71  | 81598 | -0,17193 | 4 | -0,17193 | 1 | 18 | 0,368153 |          |       |
| 72  | 78609 | -0,00811 | 5 | -0,00811 | 1 | 19 | 0,004649 |          |       |
| 73  | 68517 | 0,311795 | 6 | 0,311795 | 1 | 20 | 0,000278 |          |       |
| 74  | 71938 | 0,39616  | 7 | 0,39616  | 2 | 1  | 0,833092 | 0,383302 | 13/20 |
| 75  | 76716 | 0,215606 | 1 | 0,215606 | 2 | 2  | 0,540774 |          |       |
| 76  | 82115 | 0,027762 | 2 | 0,027762 | 2 | 3  | -0,06834 |          |       |
| 77  | 83995 | -0,03645 | 3 | -0,03645 | 2 | 4  | 0,027762 |          |       |
| 78  | 90241 | -0,05802 | 4 | -0,05802 | 2 | 5  | 0,248403 |          |       |
| 79  | 77692 | 0,116351 | 5 | 0,116351 | 2 | 6  | 0,145776 |          |       |
| 80  | 70237 | 0,307003 | 6 | 0,307003 | 2 | 7  | 0,389544 |          |       |
| 81  | 69497 | 0,298721 | 7 | 0,298721 | 2 | 8  | 0,545406 |          |       |
| 82  | 71977 | 0,296313 | 1 | 0,296313 | 2 | 9  | 0,71472  |          |       |
| 83  | 78993 | 0,248403 | 2 | 0,248403 | 2 | 10 | 0,571106 |          |       |
| 84  | 79123 | 0,202059 | 3 | 0,202059 | 2 | 11 | 0,56017  |          |       |
| 85  | 81357 | 0,320394 | 4 | 0,320394 | 2 | 12 | 0,609405 |          |       |
| 86  | 78838 | 0,440548 | 5 | 0,440548 | 2 | 13 | 0,718404 |          |       |
| 87  | 72258 | 0,527497 | 6 | 0,527497 | 2 | 14 | 0,602925 |          |       |
| 88  | 73597 | 0,526067 | 7 | 0,526067 | 2 | 15 | 0,605019 |          |       |
| 89  | 73426 | 0,395235 | 1 | 0,395235 | 2 | 16 | 0,494937 |          |       |
| 90  | 77928 | 0,145776 | 2 | 0,145776 | 2 | 17 | 0,477868 |          |       |
| 91  | 82020 | 0,08347  | 3 | 0,08347  | 2 | 18 | 0,071667 |          |       |
| 92  | 96755 | 0,102804 | 4 | 0,102804 | 2 | 19 | -0,18503 |          |       |
| 93  | 87252 | 0,320819 | 5 | 0,320819 | 2 | 20 | -0,23757 |          |       |
| 94  | 71139 | 0,499389 | 6 | 0,499389 | 3 | 1  | 0,798643 | 0,346759 | 13/20 |
| 95  | 67460 | 0,548743 | 7 | 0,548743 | 3 | 2  | 0,383754 |          |       |
| 96  | 74207 | 0,428514 | 1 | 0,428514 | 3 | 3  | -0,17189 |          |       |
| 97  | 76455 | 0,389544 | 2 | 0,389544 | 3 | 4  | -0,03645 |          |       |
| 98  | 84890 | 0,400223 | 3 | 0,400223 | 3 | 5  | 0,202059 |          |       |
| 99  | 92685 | 0,470877 | 4 | 0,470877 | 3 | 6  | 0,08347  |          |       |
| 100 | 81538 | 0,632728 | 5 | 0,632728 | 3 | 7  | 0,400223 |          |       |
| 101 | 81295 | 0,699566 | 6 | 0,699566 | 3 | 8  | 0,451569 |          |       |
| 102 | 78898 | 0,715578 | 7 | 0,715578 | 3 | 9  | 0,698072 |          |       |
| 103 | 79759 | 0,669878 | 1 | 0,669878 | 3 | 10 | 0,527833 |          |       |
| 104 | 93179 | 0,545406 | 2 | 0,545406 | 3 | 11 | 0,574066 |          |       |
| 105 | 93583 | 0,451569 | 3 | 0,451569 | 3 | 12 | 0,621132 |          |       |
| 106 | 93736 | 0,506118 | 4 | 0,506118 | 3 | 13 | 0,674633 |          |       |
| 107 | 86990 | 0,607988 | 5 | 0,607988 | 3 | 14 | 0,59476  |          |       |
| 108 | 78677 | 0,702738 | 6 | 0,702738 | 3 | 15 | 0,575404 |          |       |
| 109 | 71674 | 0,771323 | 7 | 0,771323 | 3 | 16 | 0,488039 |          |       |
| 110 | 84952 | 0,778017 | 1 | 0,778017 | 3 | 17 | 0,402127 |          |       |
| 111 | 88726 | 0,71472  | 2 | 0,71472  | 3 | 18 | 0,009761 |          |       |
| 112 | 96296 | 0,698072 | 3 | 0,698072 | 3 | 19 | -0,11507 |          |       |
| 113 | 99237 | 0,692351 | 4 | 0,692351 | 3 | 20 | -0,22695 |          |       |
| 114 | 95176 | 0,726056 | 5 | 0,726056 | 4 | 1  | 0,774313 | 0,38065  | 12/20 |

|     |        |          |   |          |   |    |          |          |       |
|-----|--------|----------|---|----------|---|----|----------|----------|-------|
| 115 | 81646  | 0,75754  | 6 | 0,75754  | 4 | 2  | 0,311278 |          |       |
| 116 | 90580  | 0,783995 | 7 | 0,783995 | 4 | 3  | -0,17193 |          |       |
| 117 | 95791  | 0,719714 | 1 | 0,719714 | 4 | 4  | -0,05802 |          |       |
| 118 | 103269 | 0,571106 | 2 | 0,571106 | 4 | 5  | 0,320394 |          |       |
| 119 | 108305 | 0,527833 | 3 | 0,527833 | 4 | 6  | 0,102804 |          |       |
| 120 | 107714 | 0,562433 | 4 | 0,562433 | 4 | 7  | 0,470877 |          |       |
| 121 | 100380 | 0,610005 | 5 | 0,610005 | 4 | 8  | 0,506118 |          |       |
| 122 | 97159  | 0,666455 | 6 | 0,666455 | 4 | 9  | 0,692351 |          |       |
| 123 | 91816  | 0,686601 | 7 | 0,686601 | 4 | 10 | 0,562433 |          |       |
| 124 | 93546  | 0,625795 | 1 | 0,625795 | 4 | 11 | 0,602733 |          |       |
| 125 | 107449 | 0,56017  | 2 | 0,56017  | 4 | 12 | 0,667945 |          |       |
| 126 | 117149 | 0,574066 | 3 | 0,574066 | 4 | 13 | 0,685452 |          |       |
| 127 | 126792 | 0,602733 | 4 | 0,602733 | 4 | 14 | 0,594878 |          |       |
| 128 | 125224 | 0,634611 | 5 | 0,634611 | 4 | 15 | 0,592655 |          |       |
| 129 | 109948 | 0,746575 | 6 | 0,746575 | 4 | 16 | 0,59711  |          |       |
| 130 | 105959 | 0,788147 | 7 | 0,788147 | 4 | 17 | 0,462685 |          |       |
| 131 | 116523 | 0,66546  | 1 | 0,66546  | 4 | 18 | 0,043801 |          |       |
| 132 | 121422 | 0,609405 | 2 | 0,609405 | 4 | 19 | 0,000826 |          |       |
| 133 | 131498 | 0,621132 | 3 | 0,621132 | 4 | 20 | -0,1457  |          |       |
| 134 | 131555 | 0,667945 | 4 | 0,667945 | 5 | 1  | 0,763159 | 0,467941 | 13/20 |
| 135 | 129557 | 0,726055 | 5 | 0,726055 | 5 | 2  | 0,266571 |          |       |
| 136 | 114896 | 0,795896 | 6 | 0,795896 | 5 | 3  | -0,00811 |          |       |
| 137 | 108855 | 0,811018 | 7 | 0,811018 | 5 | 4  | 0,116351 |          |       |
| 138 | 122083 | 0,780229 | 1 | 0,780229 | 5 | 5  | 0,440548 |          |       |
| 139 | 136934 | 0,718404 | 2 | 0,718404 | 5 | 6  | 0,320819 |          |       |
| 140 | 139155 | 0,674633 | 3 | 0,674633 | 5 | 7  | 0,632728 |          |       |
| 141 | 143260 | 0,685452 | 4 | 0,685452 | 5 | 8  | 0,607988 |          |       |
| 142 | 135048 | 0,733599 | 5 | 0,733599 | 5 | 9  | 0,726056 |          |       |
| 143 | 124422 | 0,777163 | 6 | 0,777163 | 5 | 10 | 0,610005 |          |       |
| 144 | 126372 | 0,784775 | 7 | 0,784775 | 5 | 11 | 0,634611 |          |       |
| 145 | 144280 | 0,72027  | 1 | 0,72027  | 5 | 12 | 0,726055 |          |       |
| 146 | 146482 | 0,602925 | 2 | 0,602925 | 5 | 13 | 0,733599 |          |       |
| 147 | 141526 | 0,59476  | 3 | 0,59476  | 5 | 14 | 0,668216 |          |       |
| 148 | 182683 | 0,594878 | 4 | 0,594878 | 5 | 15 | 0,667777 |          |       |
| 149 | 158002 | 0,668216 | 5 | 0,668216 | 5 | 16 | 0,683387 |          |       |
| 150 | 131120 | 0,736841 | 6 | 0,736841 | 5 | 17 | 0,537366 |          |       |
| 151 | 140363 | 0,759236 | 7 | 0,759236 | 5 | 18 | 0,114956 |          |       |
| 152 | 164750 | 0,707716 | 1 | 0,707716 | 5 | 19 | 0,161079 |          |       |
| 153 | 174539 | 0,605019 | 2 | 0,605019 | 5 | 20 | -0,04435 |          |       |
| 154 | 181353 | 0,575404 | 3 | 0,575404 | 6 | 1  | 0,789508 | 0,557804 | 14/20 |
| 155 | 195611 | 0,592655 | 4 | 0,592655 | 6 | 2  | 0,276242 |          |       |
| 156 | 178369 | 0,667777 | 5 | 0,667777 | 6 | 3  | 0,311795 |          |       |
| 157 | 164816 | 0,706037 | 6 | 0,706037 | 6 | 4  | 0,307003 |          |       |
| 158 | 162497 | 0,692452 | 7 | 0,692452 | 6 | 5  | 0,527497 |          |       |
| 159 | 175710 | 0,653118 | 1 | 0,653118 | 6 | 6  | 0,499389 |          |       |
| 160 | 199422 | 0,494937 | 2 | 0,494937 | 6 | 7  | 0,699566 |          |       |

|     |        |          |   |          |   |    |          |          |       |
|-----|--------|----------|---|----------|---|----|----------|----------|-------|
| 161 | 210308 | 0,488039 | 3 | 0,488039 | 6 | 8  | 0,702738 |          |       |
| 162 | 215135 | 0,59711  | 4 | 0,59711  | 6 | 9  | 0,75754  |          |       |
| 163 | 196362 | 0,683387 | 5 | 0,683387 | 6 | 10 | 0,666455 |          |       |
| 164 | 178891 | 0,7602   | 6 | 0,7602   | 6 | 11 | 0,746575 |          |       |
| 165 | 172555 | 0,783989 | 7 | 0,783989 | 6 | 12 | 0,795896 |          |       |
| 166 | 209690 | 0,656816 | 1 | 0,656816 | 6 | 13 | 0,777163 |          |       |
| 167 | 215081 | 0,477868 | 2 | 0,477868 | 6 | 14 | 0,736841 |          |       |
| 168 | 225012 | 0,402127 | 3 | 0,402127 | 6 | 15 | 0,706037 |          |       |
| 169 | 238630 | 0,462685 | 4 | 0,462685 | 6 | 16 | 0,7602   |          |       |
| 170 | 217665 | 0,537366 | 5 | 0,537366 | 6 | 17 | 0,600851 |          |       |
| 171 | 199356 | 0,600851 | 6 | 0,600851 | 6 | 18 | 0,195316 |          |       |
| 172 | 197440 | 0,574631 | 7 | 0,574631 | 6 | 19 | 0,282929 |          |       |
| 173 | 221056 | 0,368153 | 1 | 0,368153 | 6 | 20 | 0,016546 |          |       |
| 174 | 236580 | 0,071667 | 2 | 0,071667 | 7 | 1  | 0,767306 | 0,571253 | 15/20 |
| 175 | 250058 | 0,009761 | 3 | 0,009761 | 7 | 2  | 0,230716 |          |       |
| 176 | 241680 | 0,043801 | 4 | 0,043801 | 7 | 3  | 0,39616  |          |       |
| 177 | 227333 | 0,114956 | 5 | 0,114956 | 7 | 4  | 0,298721 |          |       |
| 178 | 222884 | 0,195316 | 6 | 0,195316 | 7 | 5  | 0,526067 |          |       |
| 179 | 206535 | 0,208246 | 7 | 0,208246 | 7 | 6  | 0,548743 |          |       |
| 180 | 240767 | 0,004649 | 1 | 0,004649 | 7 | 7  | 0,715578 |          |       |
| 181 | 281499 | -0,18503 | 2 | -0,18503 | 7 | 8  | 0,771323 |          |       |
| 182 | 276640 | -0,11507 | 3 | -0,11507 | 7 | 9  | 0,783995 |          |       |
| 183 | 289991 | 0,000826 | 4 | 0,000826 | 7 | 10 | 0,686601 |          |       |
| 184 | 261967 | 0,161079 | 5 | 0,161079 | 7 | 11 | 0,788147 |          |       |
| 185 | 225286 | 0,282929 | 6 | 0,282929 | 7 | 12 | 0,811018 |          |       |
| 186 | 219632 | 0,258542 | 7 | 0,258542 | 7 | 13 | 0,784775 |          |       |
| 187 | 249892 | 0,000278 | 1 | 0,000278 | 7 | 14 | 0,759236 |          |       |
| 188 | 290363 | -0,23757 | 2 | -0,23757 | 7 | 15 | 0,692452 |          |       |
| 189 | 287597 | -0,22695 | 3 | -0,22695 | 7 | 16 | 0,783989 |          |       |
| 190 | 291504 | -0,1457  | 4 | -0,1457  | 7 | 17 | 0,574631 |          |       |
| 191 | 259867 | -0,04435 | 5 | -0,04435 | 7 | 18 | 0,208246 |          |       |
| 192 | 224589 | 0,016546 | 6 | 0,016546 | 7 | 19 | 0,258542 |          |       |
| 193 | 200970 | 0,038824 | 7 | 0,038824 | 7 | 20 | 0,038824 |          |       |
| 194 | 255117 |          |   |          |   |    |          |          |       |
| 195 | 272913 |          |   |          |   |    |          |          |       |
| 196 | 283977 |          |   |          |   |    |          |          |       |
| 197 | 283782 |          |   |          |   |    |          |          |       |
| 198 | 271031 |          |   |          |   |    |          |          |       |
| 199 | 225645 |          |   |          |   |    |          |          |       |
| 200 | 219202 |          |   |          |   |    |          |          |       |
| 201 | 268712 |          |   |          |   |    |          |          |       |
| 202 | 287955 |          |   |          |   |    |          |          |       |
| 203 | 286629 |          |   |          |   |    |          |          |       |
| 204 | 287391 |          |   |          |   |    |          |          |       |
| 205 | 265682 |          |   |          |   |    |          |          |       |
| 206 | 216826 |          |   |          |   |    |          |          |       |

|     |        |
|-----|--------|
| 207 | 198498 |
| 208 | 254103 |
| 209 | 272134 |
| 210 | 267720 |
| 211 | 258578 |
| 212 | 268958 |
| 213 | 210600 |

**Table s1.** Presentation of the Pearson correlation coefficients between 20 numbers of world daily new cases observed between the days 34 to 53 after the 24 January 2020 (date of the start of the Covid-19 outbreak with confirmed cases in Europe) and series of 20 numbers of world daily new cases observed in running windows of length 20 days until day 213, calculated using the online facility <https://www.socscistatistics.com/tests/pearson/default2.aspx>, and data from worldometer (<https://www.worldometers.info/coronavirus/>). The last column of the Table gives the mean of the correlation coefficients between the first window and the 20 running windows starting at week day E and after the number of such 20 correlation coefficients which are significantly strictly positive.
